# Supplementary material for: Effect of phenol on the synthesis of benzoxazine
Source: Royal Society of Chemistry journal article supplement (doi:10.1039/c5ra17395g), 2015-01-01
Supplement: c5ra17395g1.pdf [file c5ra17395g1.pdf]

## Effect of phenol on the synthesis of benzoxazine

Qin Zhang, Po Yang\*, Yuyuan Deng, Chengxi Zhang, Rongqi Zhu and Yi Gu\*

*State Key Laboratory of Polymer Materials Engineering (Sichuan University),  
College of Polymer Science and Engineering, Sichuan University, Chengdu 610065,  
China*

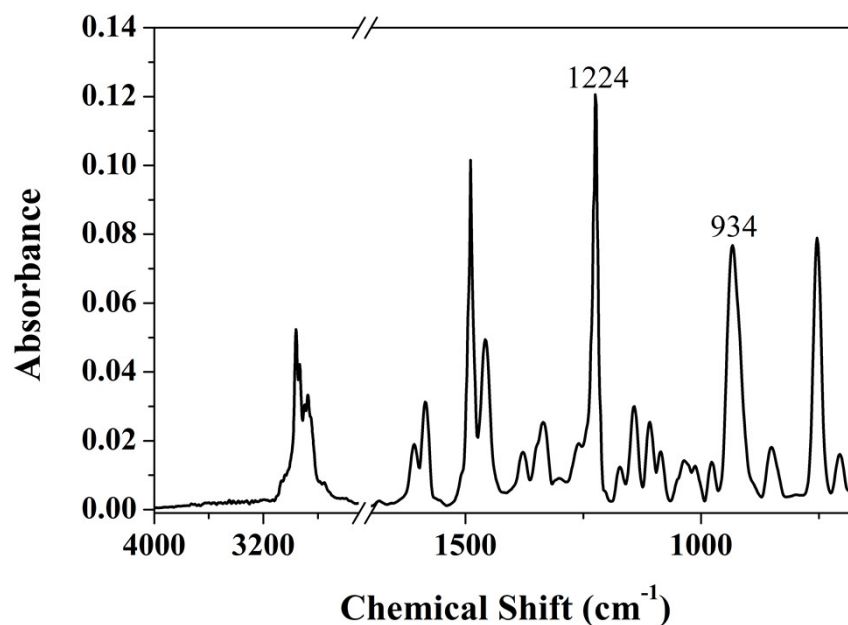

Fig. S1 FTIR spectrum of 3,4-dihydro-2H-3-propyl-1,3-benzoxazine.

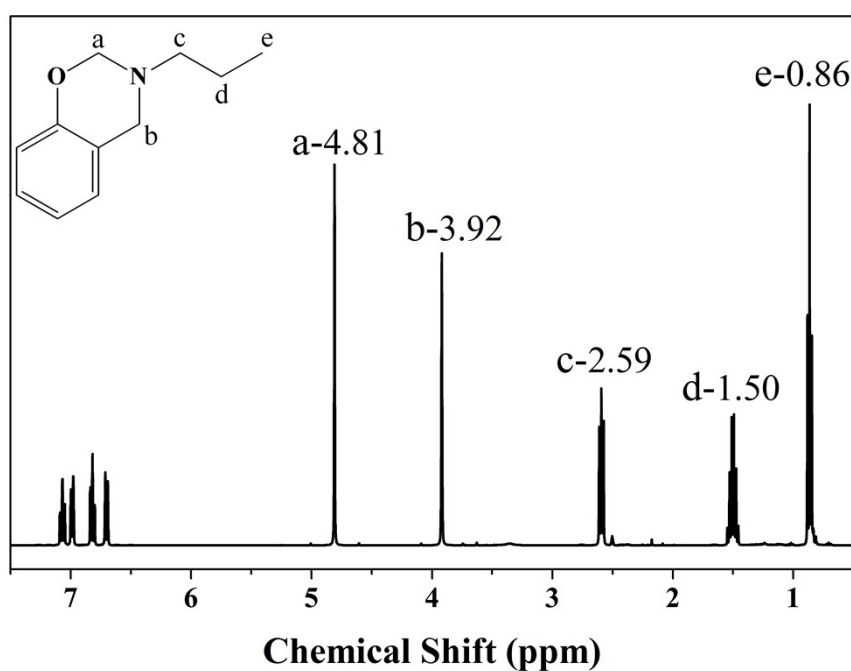

Fig. S2 <sup>1</sup>H NMR spectrum of 3,4-dihydro-2H-3-propyl-1,3-benzoxazine.

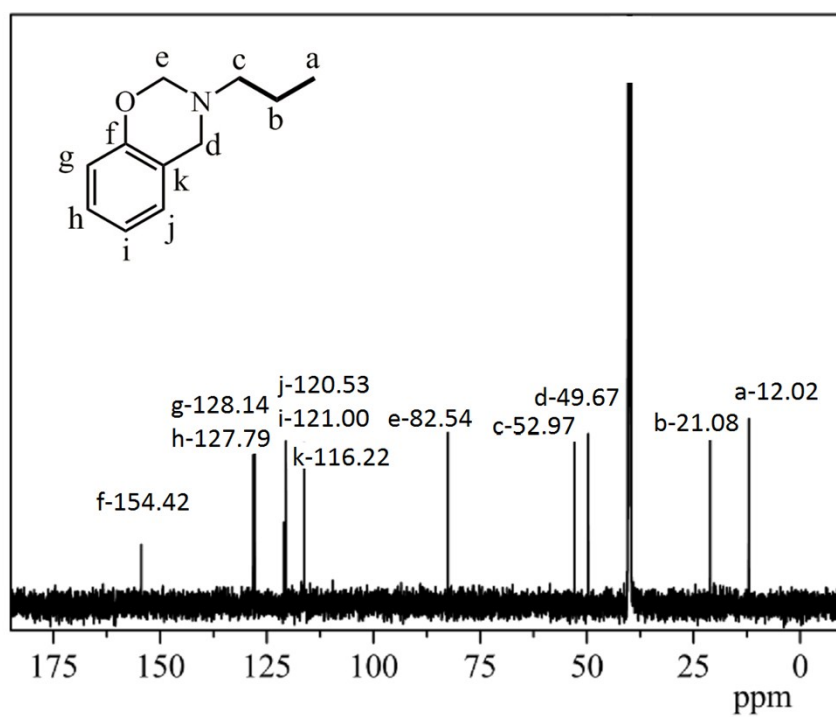

Fig. S3 <sup>13</sup>C NMR spectrum of 3,4-dihydro-2H-3-propyl-1,3-benzoxazine.

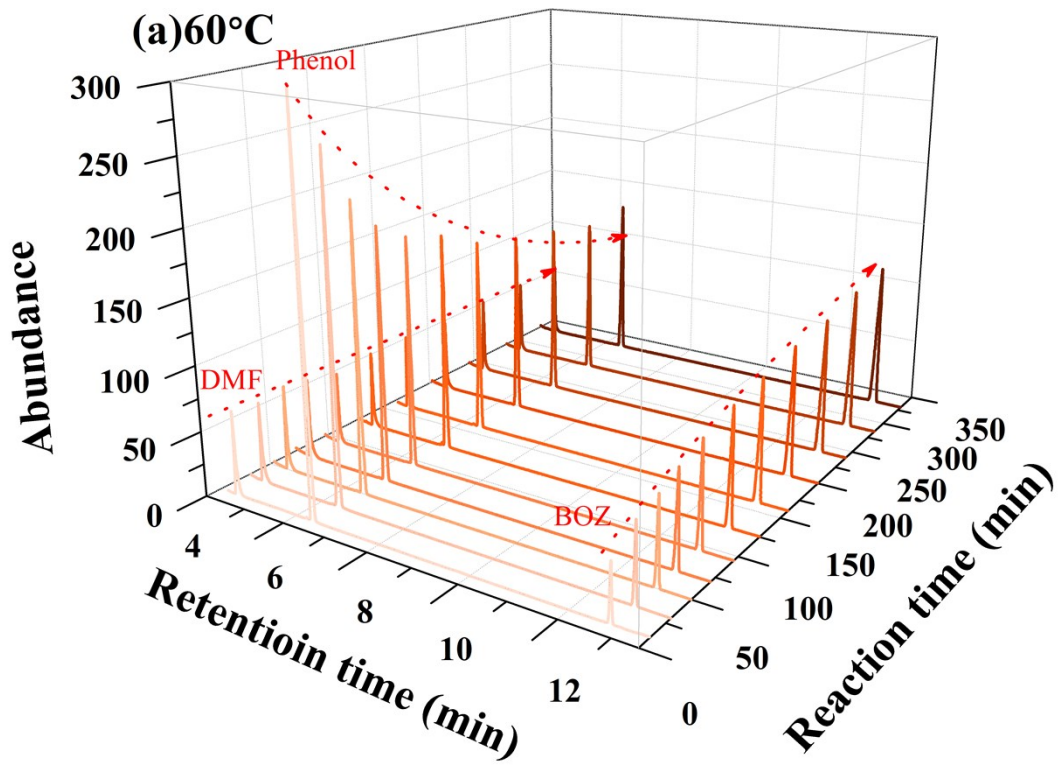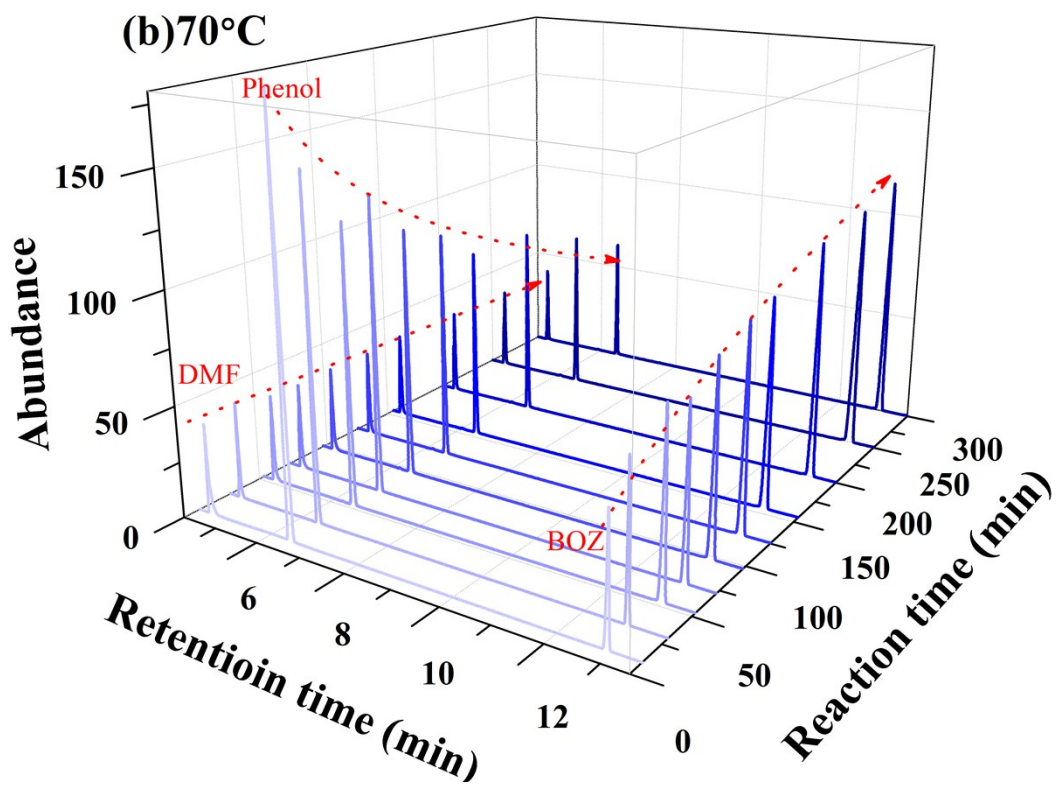

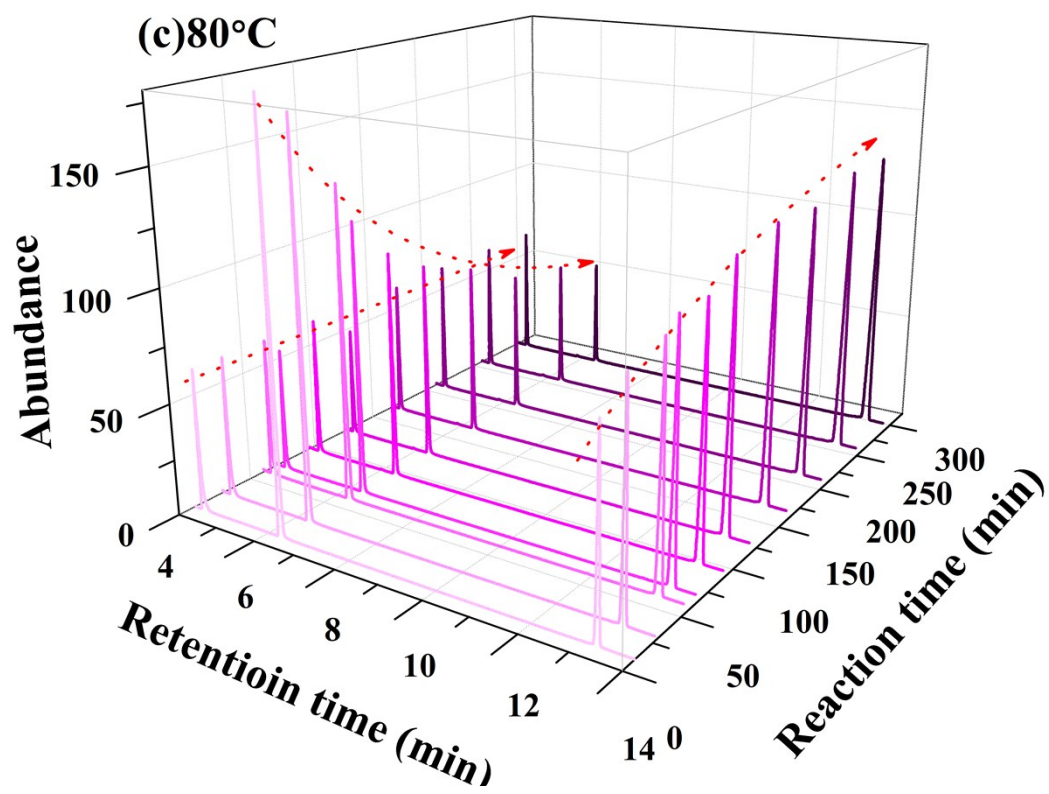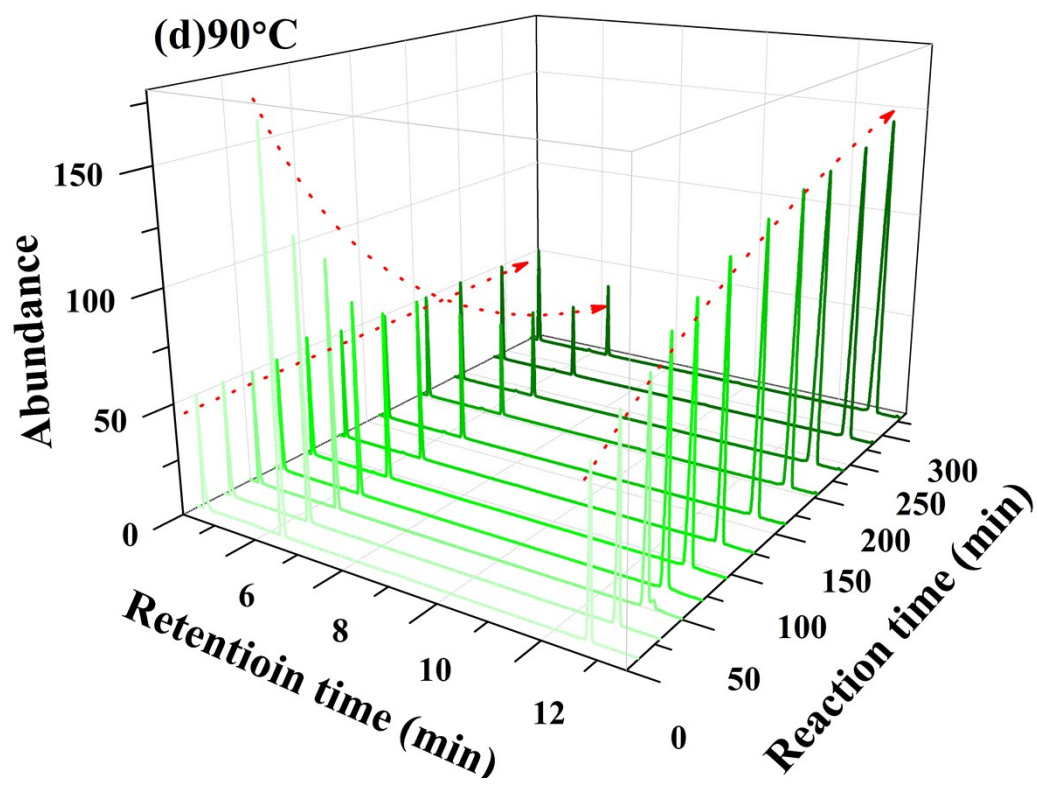

Fig. S4 GC spectra of the reaction of n-propylamine, phenol and aqueous formaldehyde with different time at different temperatures.

(a) 60 °C, (b) 70 °C, (c) 80 °C, (d) 90 °C.

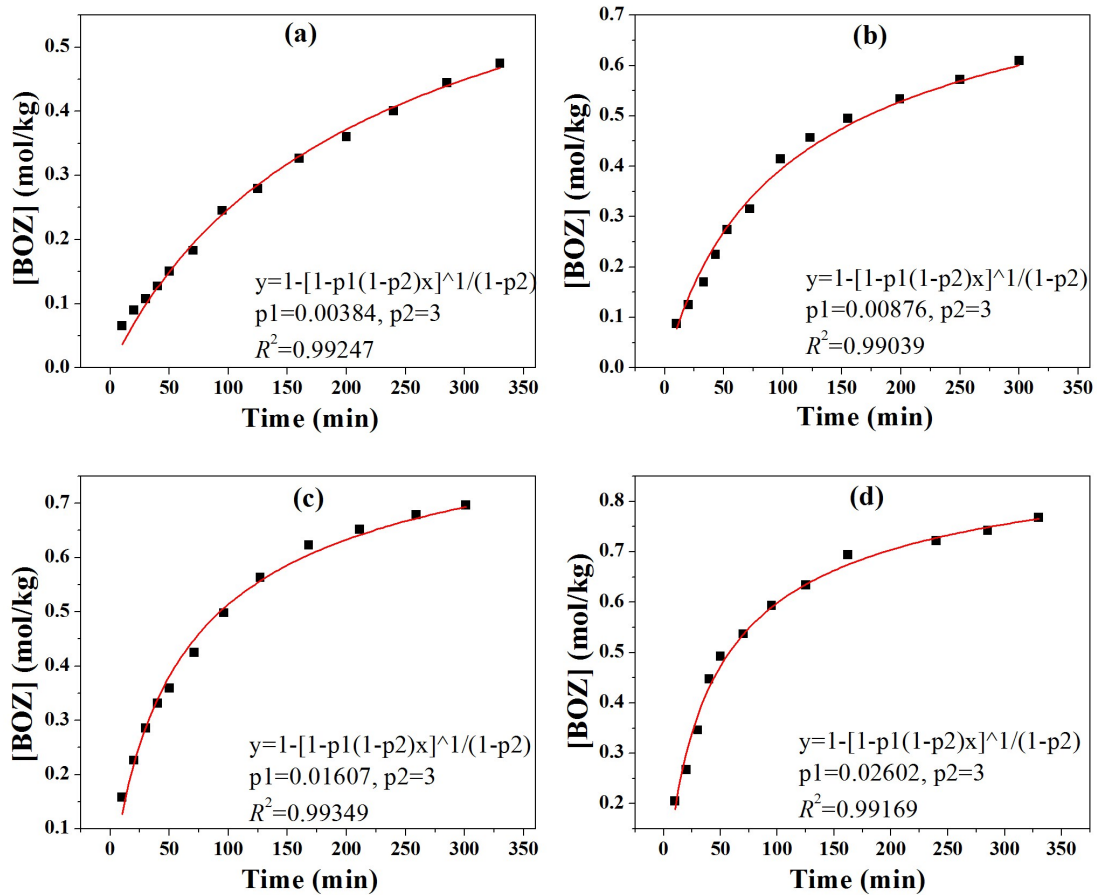

Fig. S5 Concentrations of benzoxazine versus reaction time at (a) 60 °C, (b) 70 °C, (c) 80 °C, (d) 90 °C.

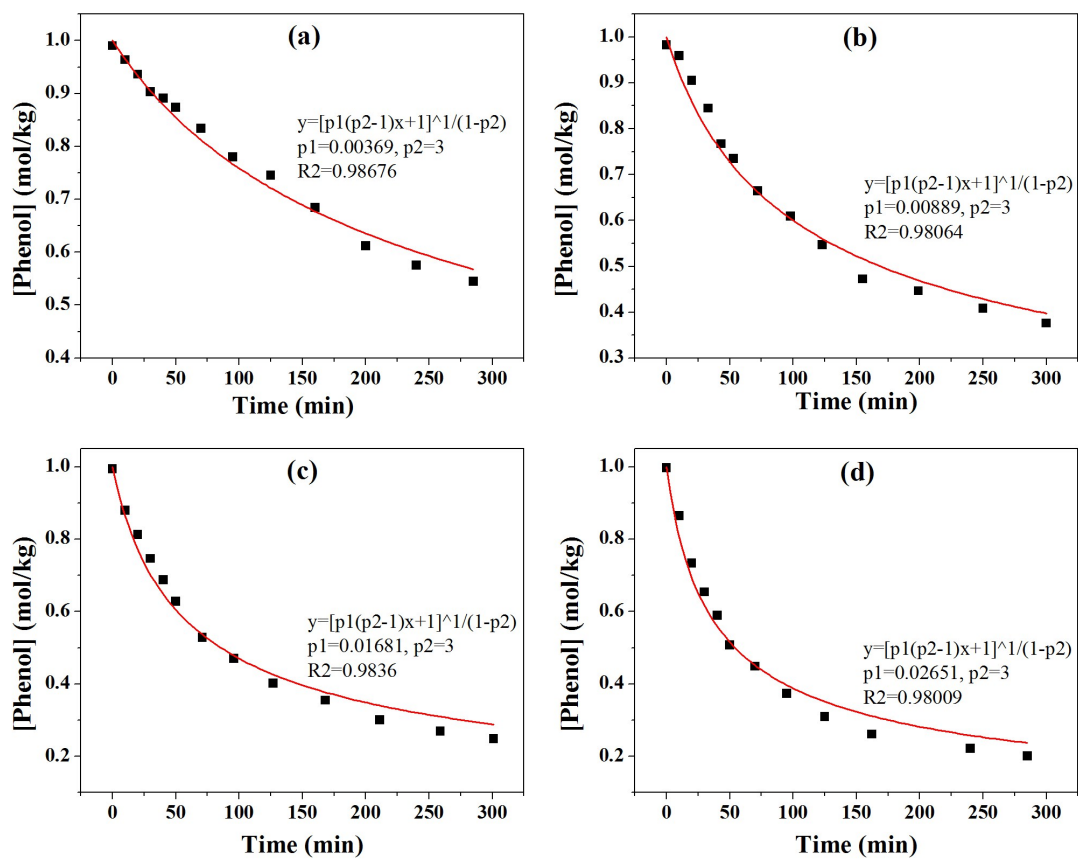

Fig. S6 Concentrations of phenol versus reaction time at (a) 60 °C, (b) 70 °C, (c) 80 °C, (d) 90 °C.
